# Supplementary material
Source: HighWire-hosted journal article supplement (https://qdcxjkg.com/highwire/filestream/112851/field_highwire_adjunct_files/0/FIGURE_legends.pdf)
Supplement: FIGURE_legends.pdf [file FIGURE_legends.pdf]

FIGURE E1. Individual plots of sputum total cell count (TCC), eosinophils and neutrophils at baseline visit. Symbols and lines as in Figure 5B. The total and differential cell counts at the baseline visit were similar between study strategies.

FIGURE E2. Proportion of patients with changes in dose of inhaled fluticasone equivalent from baseline to maintenance. The net adjustments made from baseline to maintenance visits were similar in the CS and SS.

FIGURE E3. Individual plots of sputum total cell count, eosinophils and neutrophils at the maintenance visit. Symbols and lines as in Figure 5B. Treatment guided by clinical parameters did not normalize sputum eosinophils in more than a third of patients.
